# Supplementary material for: Porphyrins conjugated to DNA as CD reporters of the salt-induced B to Z-DNA transition,
Source: Royal Society of Chemistry journal article supplement (doi:10.1039/b603409h), 2006-01-01
Supplement: b603409h.pdf [file b603409h.pdf]

## Supporting Information for manuscript entitled

# Conjugated porphyrins as a CD reporter of the salt-induced B to Z-DNA transition

(Organic and Biomolecular Chemistry 2006)

Milan Balaz,\* Benjamin C. Li, Jay D. Steinkruger, George A. Ellestad, Koji Nakanishi and Nina Berova\*

Department of Chemistry, Columbia University, New York, New York 10027, USA

[ndb1@columbia.edu](mailto:ndb1@columbia.edu), [milan.balaz@chem.ox.ac.uk](mailto:milan.balaz@chem.ox.ac.uk)

### General procedures

All the measurements have been made at room temperature in 50 mM potassium phosphate buffer at pH=7.0. The concentration of the ODNs was  $10^{-5}$  to  $10^{-6}$  M according to the experimental details. Circular dichroism spectra were recorded on a JASCO J-810 spectrophotometer using quartz cuvettes with an optic path of 1 cm. Fluorescence emission spectra were recorded on a SPEX Fluorolog-3 spectrometer FL3-22 (J. Y. Horiba, Edison, NJ) at an excitation wavelength of 420 nm using quartz cuvettes with optical path length of 1x1 cm. Absorbance spectra were recorded on a JASCO V-530 spectrophotometer using quartz cuvettes with an optic path of 1 cm.

- page B HPLC purification of porphyrin-ODN conjugate **1P**
- page C Figure SI-1: absorption spectrum of **1P**
- page C Figure SI-2: fluorescence spectrum of **1P**
- page D Figure SI-3: absorption spectrum of **1P** at different salt (NaCl and/or NiCl<sub>2</sub>) concentrations
- page D Figure SI-4: circular dichroism spectrum of **1P** at different salt (NaCl and/or NiCl<sub>2</sub>) concentrations
- page E Figure SI-5: circular dichroism spectrum of **1** at different salt (NaCl and/or NiCl<sub>2</sub>) concentrations
- page E Figure SI-6: absorption spectrum of **1** at different salt (NaCl and/or NiCl<sub>2</sub>) concentrations

## HPLC purification of porphyrin-oligonucleotide conjugate **1P**

The porphyrin-oligonucleotide **1P** was synthesized according to previously described procedure.<sup>1</sup> **1P** was purified using a JASCO HPLC system using a Waters reverse phase X-Terra semi-preparative column MS C<sub>18</sub> 2.5 $\mu$ m 10x50mm equipped with a Fenomenex column heater Thermasphere TS-130.<sup>2</sup> During the HPLC, the profile was monitored by a JASCO two-channel array detector using 260 nm wavelength for oligonucleotide detection and 420 nm wavelength for porphyrin detection (see below).

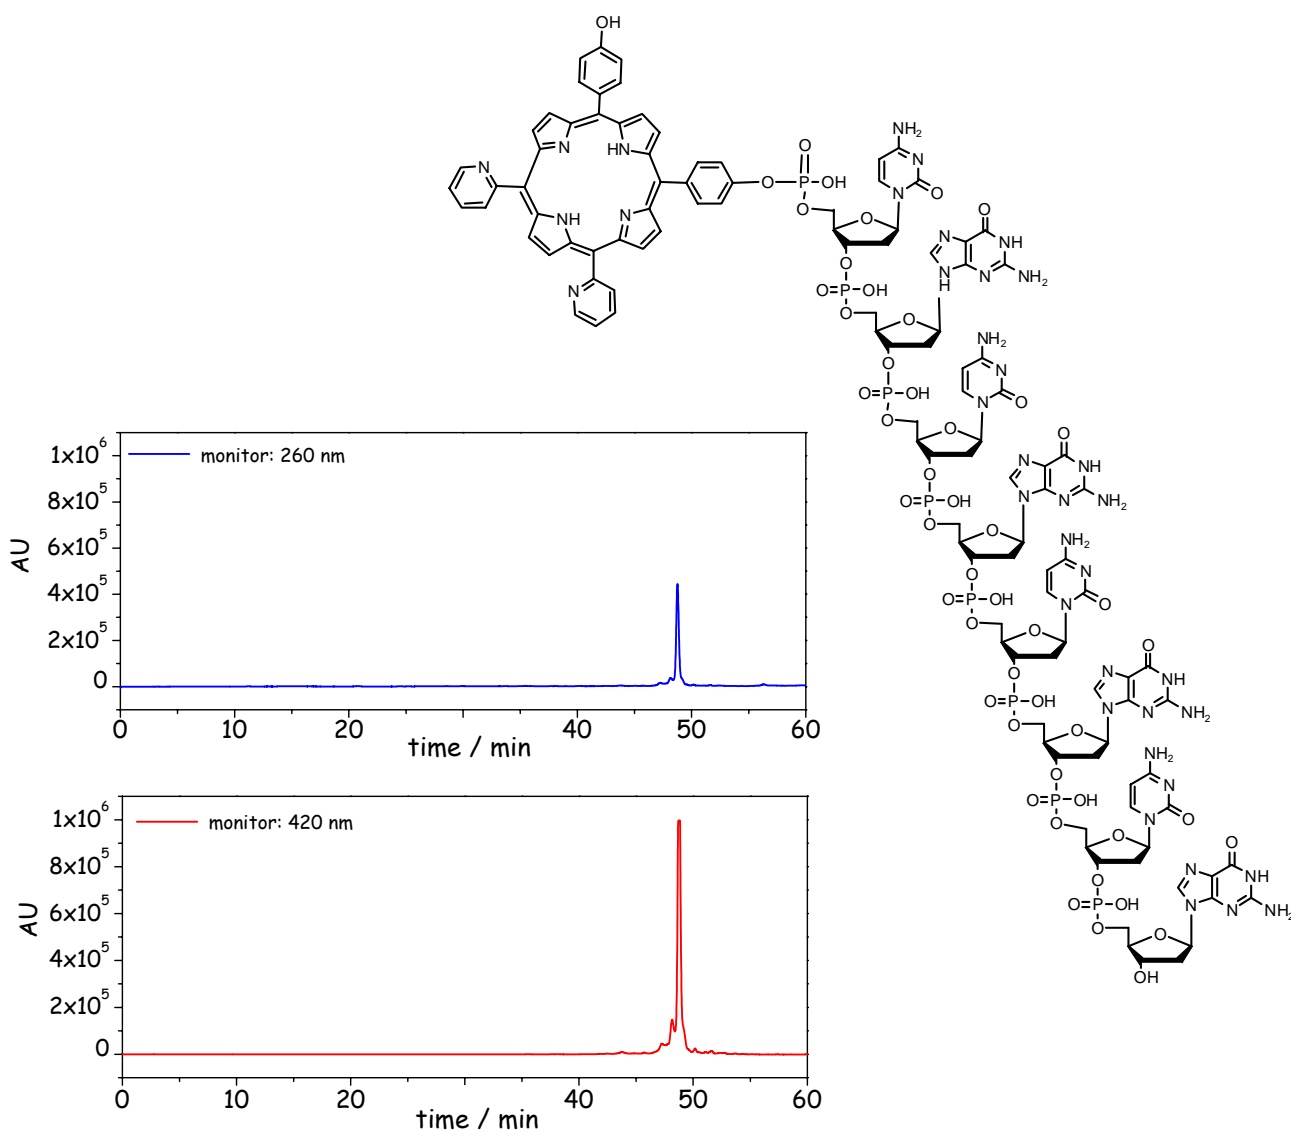

<sup>1</sup> M. Balaz, J. D. Steinkruger, G. A. Ellestad, and N. Berova, *Org. Lett.*, 2005, **7**, 5613

<sup>2</sup> M. Balaz, A. E. Holmes, M. Benedetti, G. Proni, N. Berova, *Bioorg. Med. Chem.* 2005, **13**, 241

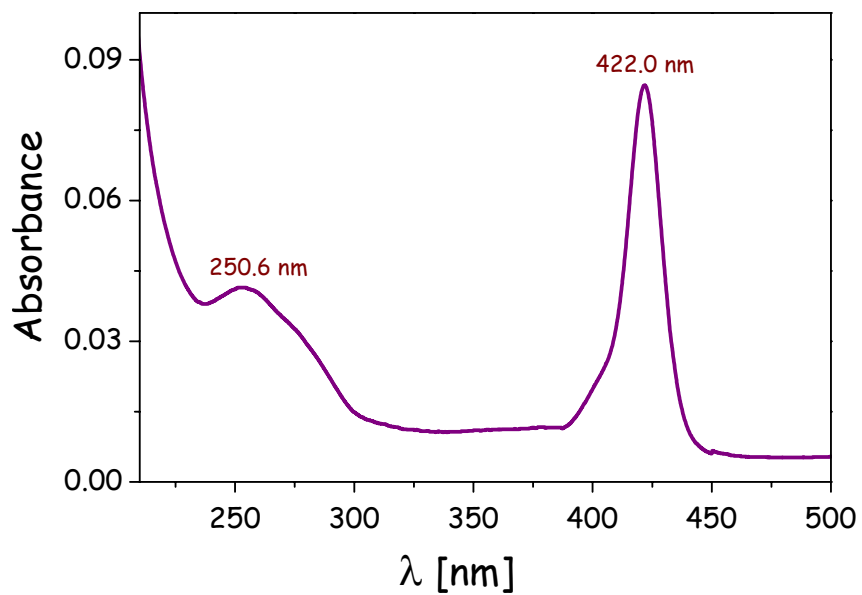

**Figure SI-1.** Absorbance spectra of porphyrin-ODN conjugate **1P** in 50 mM K-phosphate buffer, pH=7.0 at room temperature.

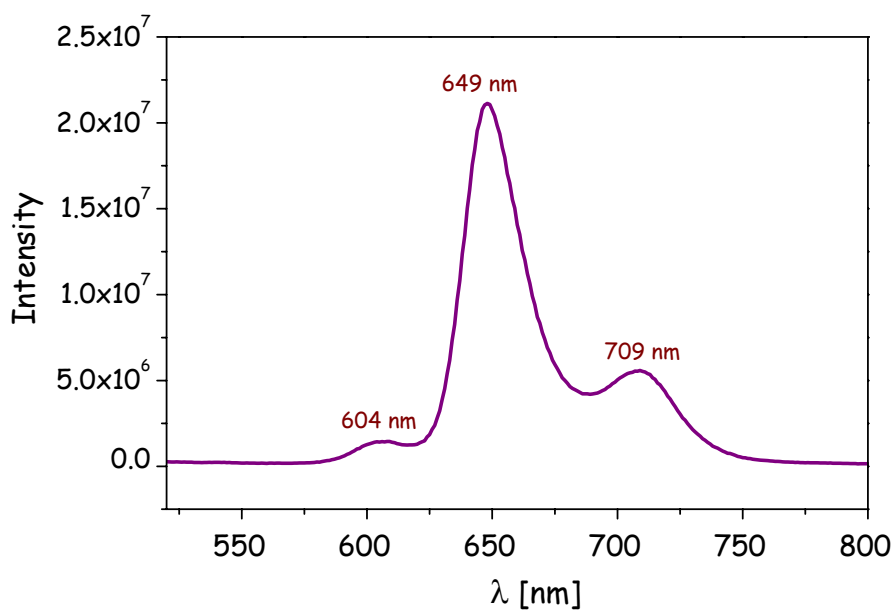

**Figure SI-2.** Fluorescence spectra of porphyrin-ODN conjugate **1P** in 50 mM K-phosphate buffer, pH=7.0 at room temperature.

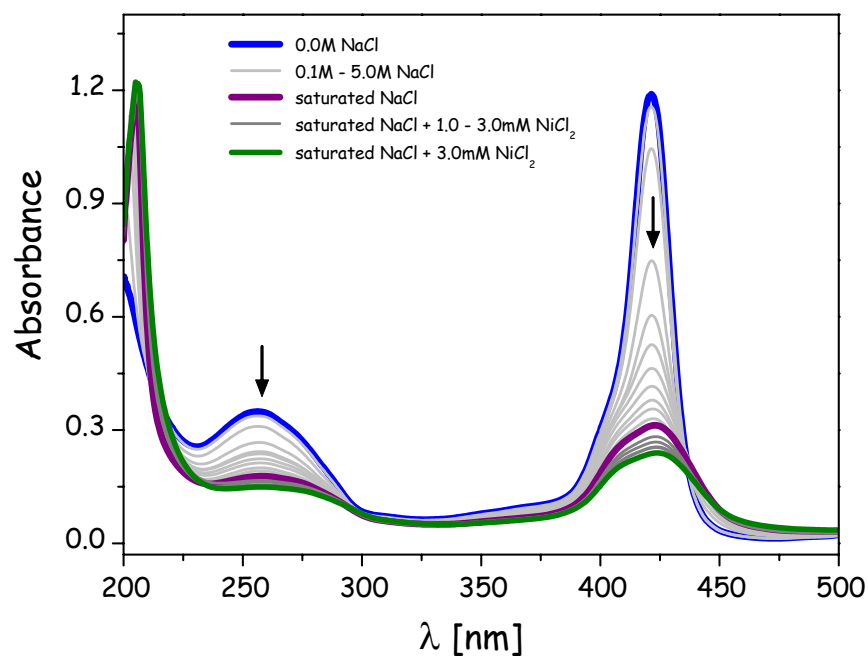

**Figure SI-3** Absorption spectrum of porphyrin-8-mer conjugate **1P** at different concentration of NaCl and  $\text{NiCl}_2$ . Conditions: 50mM K-phosphate buffer, pH=7.0; ODN concentration  $\sim 5 \cdot 10^{-6}$ M.

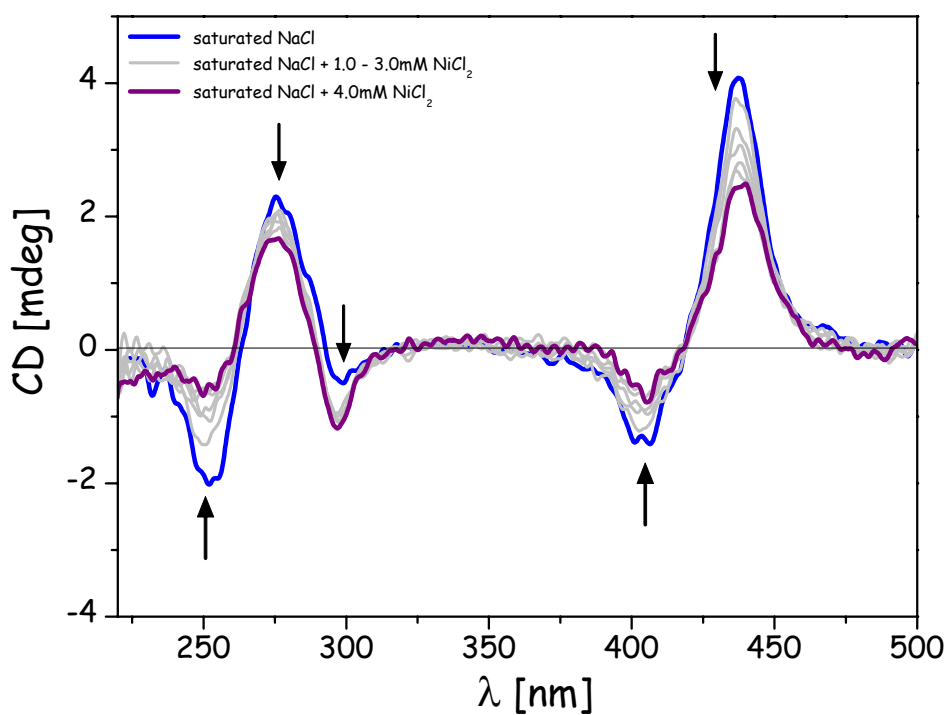

**Figure SI-4** CD spectrum of porphyrin-8-mer conjugate **1P** at different concentration of NaCl and  $\text{NiCl}_2$ . Conditions: 50mM K-phosphate buffer at pH=7.0; ODN concentration  $\sim 10^{-5}$ M.

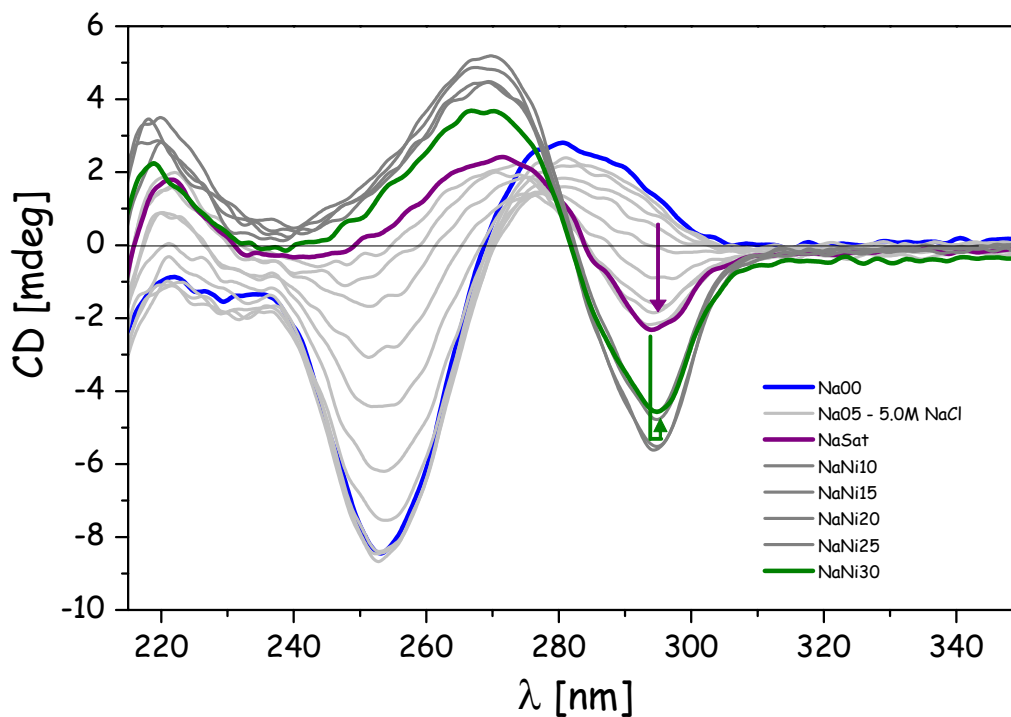

**Figure SI-5** CD spectrum of 8-mer ODN **1** at different concentration of NaCl and NiCl<sub>2</sub>.  
 Conditions: 50mM K-phosphate buffer at pH=7.0.

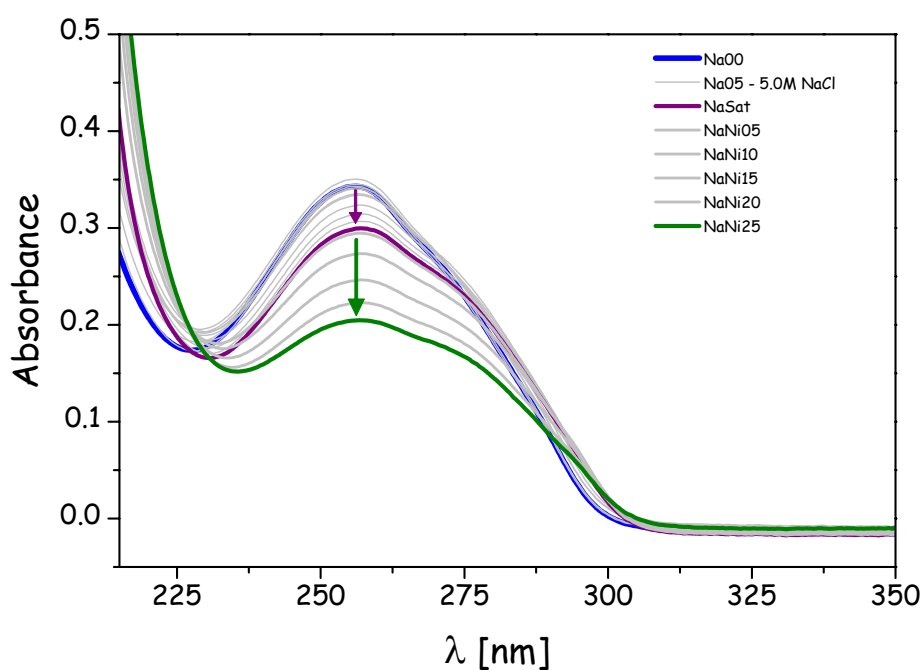

**Figure SI-6** Absorption spectrum of 8-mer ODN **1** at different concentration of NaCl and NiCl<sub>2</sub>.  
 Conditions: 50mM K-phosphate buffer at pH=7.0.
